# Supplementary material for: Microgel organocatalysts: modulation of reaction rates at liquid–liquid interfaces
Source: Royal Society of Chemistry journal article supplement (doi:10.1039/d0ma00407c), 2020-01-01
Supplement: d0ma00407c1.pdf [file d0ma00407c1.pdf]

## Supporting Information

### Microgel Organocatalysts: Modulation of Reaction Rates at Liquid-Liquid Interfaces

Denise Kleinschmidt <sup>a,b,c</sup>, Katja Nothdurft <sup>d</sup>, Mikhail V. Anakhov <sup>e</sup>, Anna Astrid Meyer <sup>a</sup>, Matthias Mork <sup>a</sup>, Rustam A. Gumerov <sup>b,e</sup>, Igor I. Potemkin <sup>b,e,f,\*</sup>, Walter Richtering <sup>d</sup> and Andrij Pich <sup>a,b,c,\*</sup>

<sup>a</sup> Research Area Functional and Interactive Polymers, RWTH Aachen University, Forckenbeckstraße 50, 52062 Aachen, Germany.

<sup>b</sup> DWI – Leibniz Institute for Interactive Materials e.V., RWTH Aachen University, Forckenbeckstraße 50, 52062 Aachen, Germany.

<sup>c</sup> Aachen Maastricht Institute for Biobased Materials (AMIBM), Maastricht University, Brightlands Chemelot Campus, Urmonderbaan 22, 6167 RD Geleen, The Netherlands.

<sup>d</sup> Institute of Physical Chemistry, RWTH Aachen University, Landoltweg 2, 52056 Aachen, Germany.

<sup>e</sup> Physics Department, Lomonosov Moscow State University, Leninskie Gory 1-2, Moscow 119991, Russian Federation.

<sup>f</sup> National Research South Ural State University, Chelyabinsk, 454080, Russian Federation.

\* corresponding authors: pich@dwil.rwth-aachen.de, igor@polly.phys.msu.ru

### Synthesis of Microgel-Catalysts Reaction Scheme

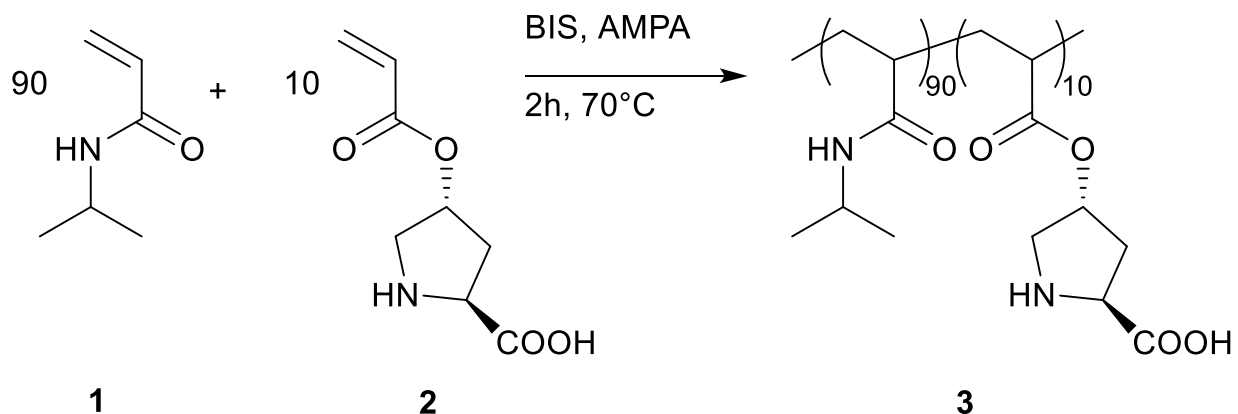

**Figure S1.** Reaction scheme of free radical precipitation polymerisation in water for synthesis of the microgel-catalysts. The main monomer *N*-isopropylacrylamide (NIPAM, **1**) is polymerised in presence of a polymerisable form of the L-proline organocatalyst (**2**). Synthesis of the latter can be found in literature.<sup>1,2</sup> As crosslinker for the co-polymer microgel (**3**), the crosslinker *N,N'*-methylenebisacrylamide (BIS) and the initiator 2,2'-azobis(2-methylpropionamidine) dihydrochloride (AMPA) were used.

## Characterisation Methods

### Thermogravimetric Analysis (TGA)

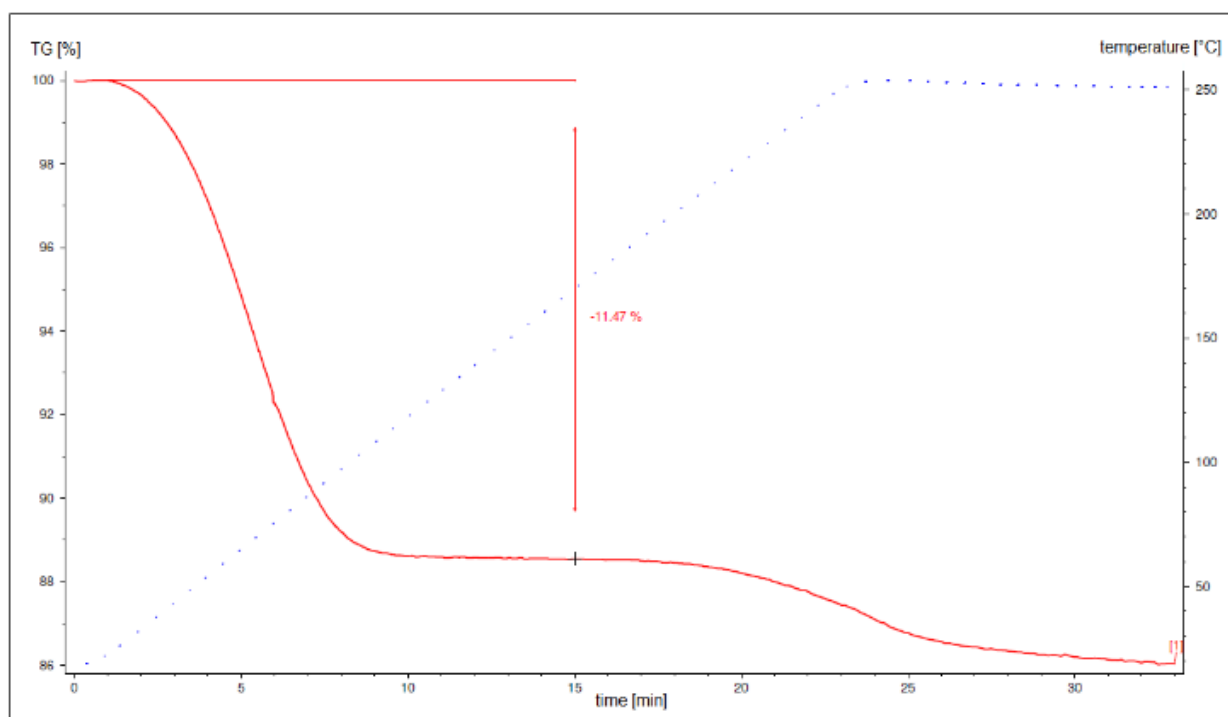

**Figure S2.** TGA Curve of freeze dried microgel-catalysts used in this work. The red lines represent the mass loss of sample. The blue dotted curve depicts the adapted temperature program.

### Attenuated Total Reflection Fourier-transform Infrared Spectroscopy (ATR-FTIR-spectroscopy)

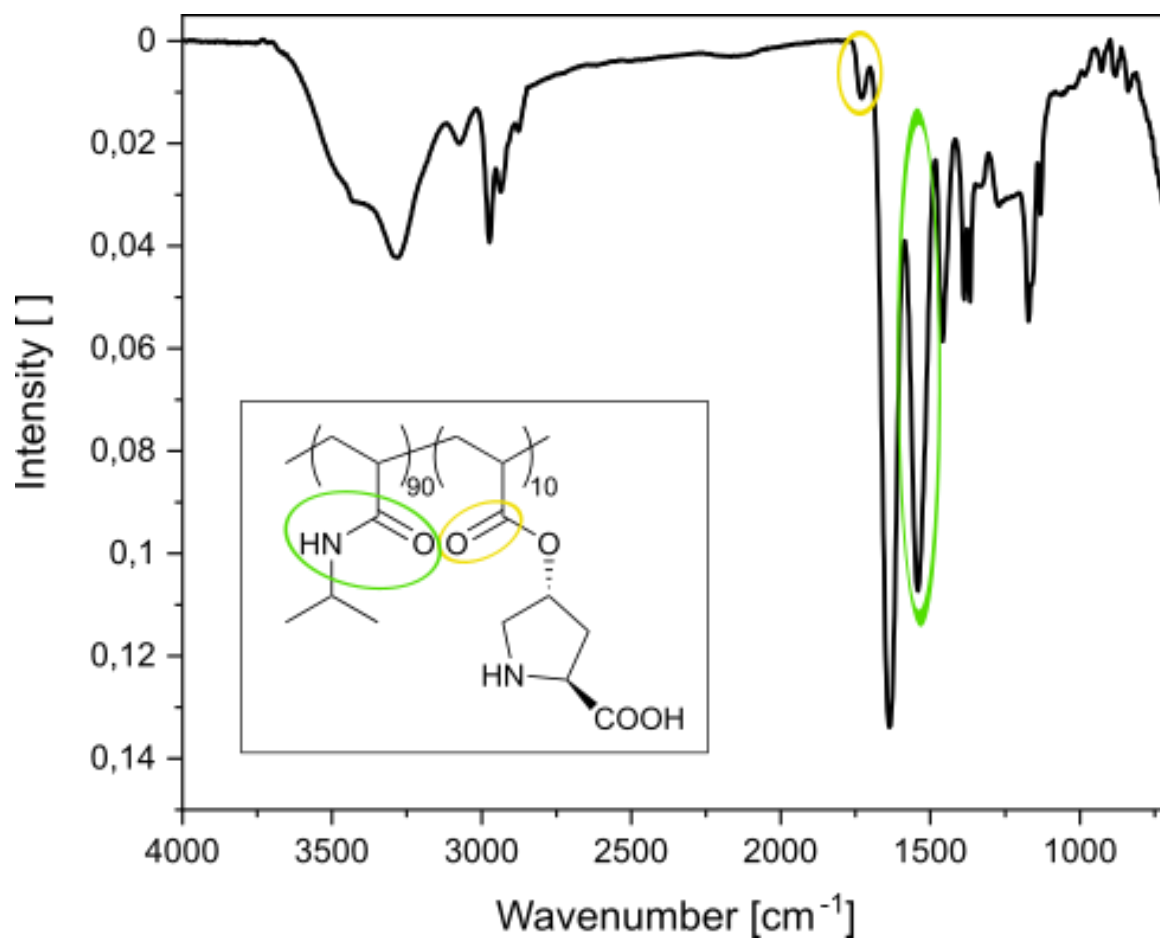

**Figure S3.** ATR-FTIR spectrum of microgel-catalysts. For calculation of the L-proline content, the intensity ratios of the carbonyl stretching band of the modified L-proline catalysts at 1733 cm<sup>-1</sup> ( $\nu(\text{C=O})_{\text{L-proline}}$ ) (yellow) was referenced to the amide II band of NIPAM at 1541 cm<sup>-1</sup> ( $\nu(\text{amide II})_{\text{PNIPAM}}$ ) (green). The procedure is in accordance with the literature.<sup>2,3</sup>

## Nuclear Magnetic Resonance Spectroscopy (NMR-spectroscopy)

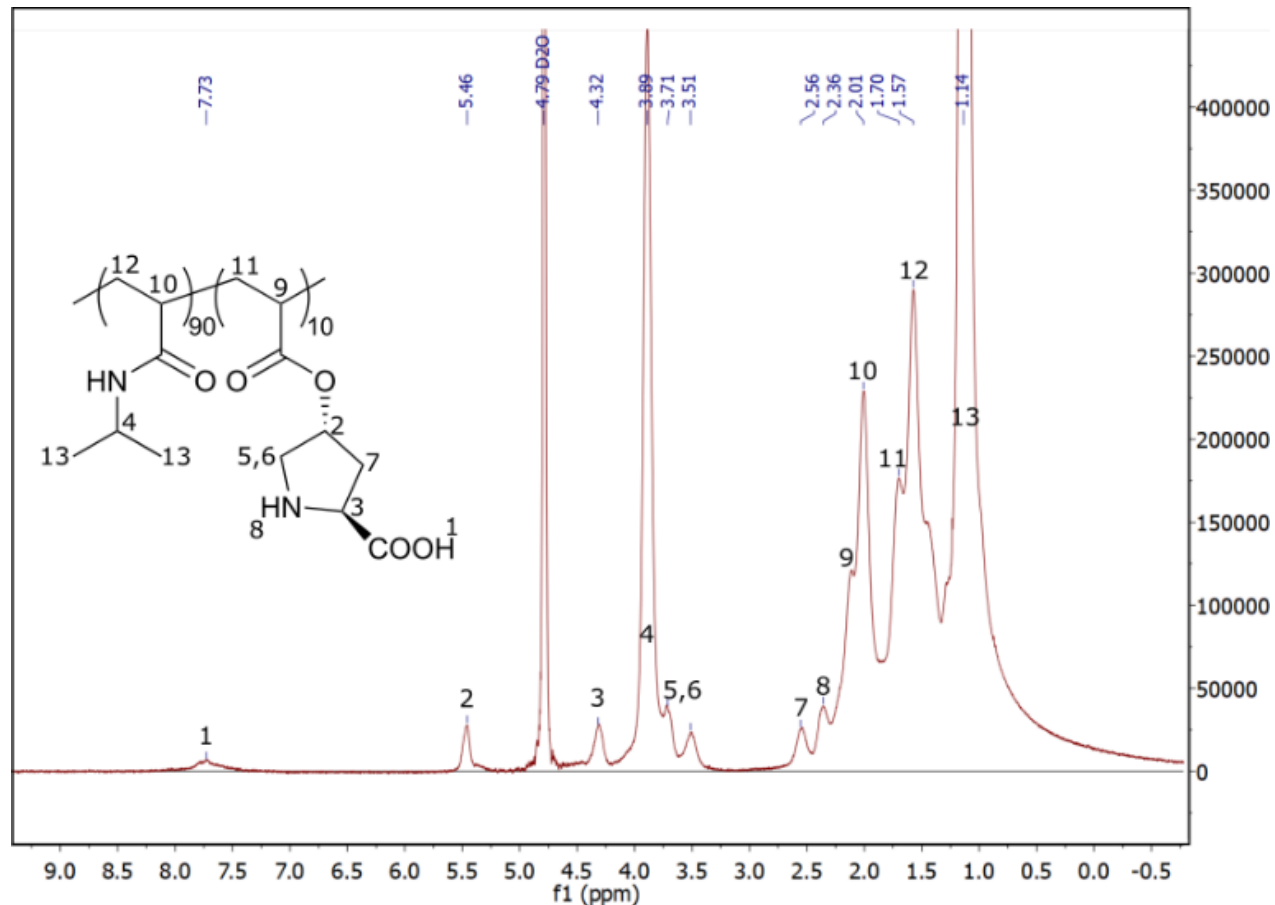

**Figure S4.** <sup>1</sup>H-NMR spectrum of the microgel-catalysts recorded in D<sub>2</sub>O. Due to overlapping of signals, these data were used for qualitative analysis only.

## Static Light Scattering (SLS)

SLS measurements were conducted at 25 °C in water, methanol and 20 mol% methanol. In case of water the partly collapsed state at 45 °C and in case of the mixture the partly swollen state at 10 °C were measured additionally. As aggregates were found, especially for the mixture, the 10 °C measurement in the mixture is always performed directly before the 25 °C measurement.

**Figure S5a** shows the scattering intensity in dependence of the scattering vector  $q$ . The microgel-

catalysts are too small to obtain any minima in the  $q$ -regime of the SLS. Thus, the scattering curves are analysed with Guinier. The Guinier plots and linear fits of the microgel-catalysts in water (25, 45 °C), methanol (25 °C) and the mixture (10, 25 °C) are shown in **Figure S5b-d**. **Table S1** displays an overview of  $R_h$ ,  $R_g$  and their ratio  $\rho$  in water, methanol and 20 mol% methanol at different temperatures.

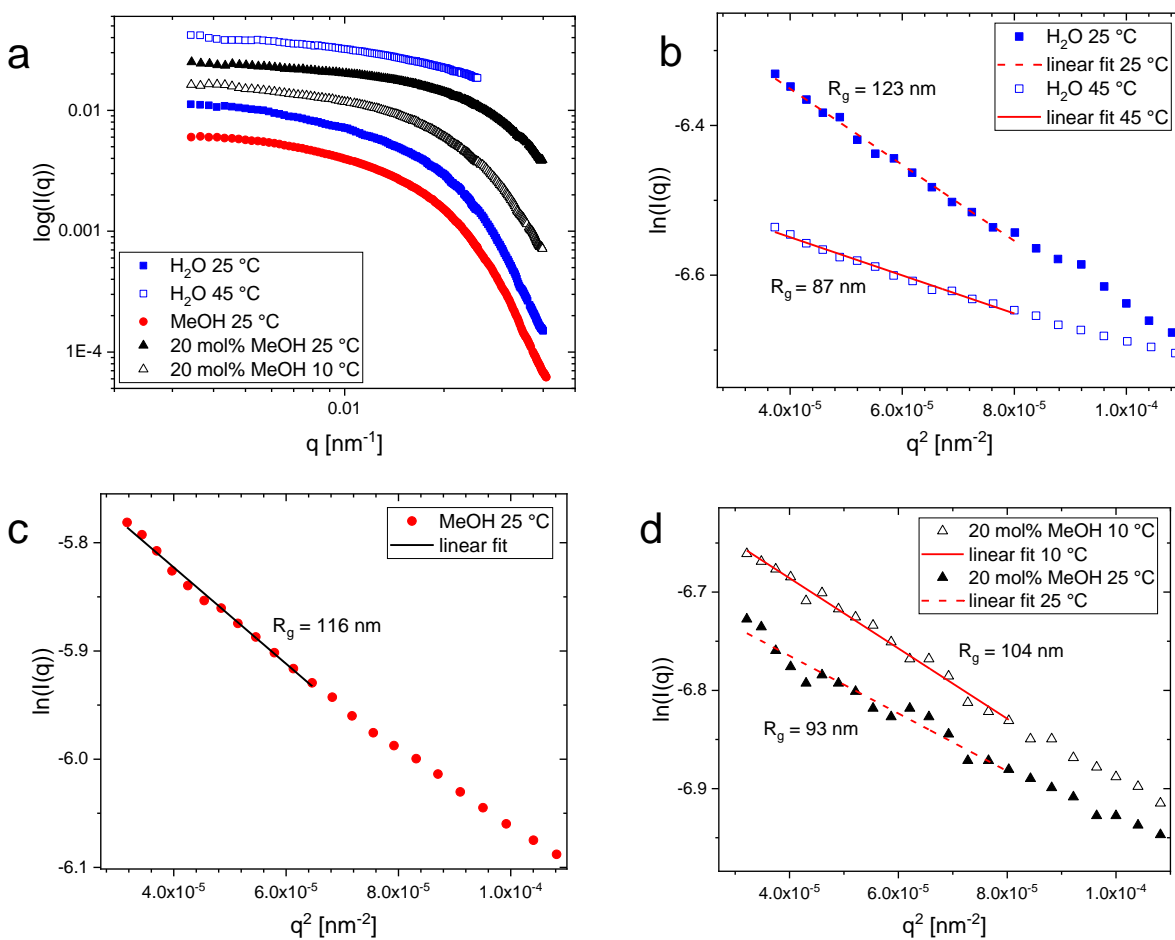

**Figure S5.** SLS form factors (a) of the microgel-catalysts in various solvents (the curves have been vertically shifted for better visibility) and the corresponding Guinier plots in water (b), methanol (c) and 20 mol% methanol (d).

**Table S1.** Comparison of the hydrodynamic radius, radius of gyration and their ratio of the microgel-catalysts in different swelling states.

| Solvent      | $T$ [°C] | $R_h$ [nm]  | $R_g$ [nm]  | $\rho = R_g/R_h$ |
|--------------|----------|-------------|-------------|------------------|
| Water        | 25       | $167 \pm 2$ | $123 \pm 2$ | $0,74 \pm 0.012$ |
|              | 45       | $110 \pm 1$ | $87 \pm 2$  | $0,79 \pm 0.02$  |
| 20 mol% MeOH | 10       | $141 \pm 1$ | $104 \pm 2$ | $0,73 \pm 0.012$ |
|              | 25       | $116 \pm 2$ | $93 \pm 3$  | $0,81 \pm 0.03$  |
| MeOH         | 25       | $175 \pm 7$ | $116 \pm 2$ | $0,66 \pm 0.03$  |

In general,  $R_g$  exhibits comparable trends to  $R_h$  concerning the swelling state of the microgel-catalysts: The largest sizes are found in pure water and methanol at room temperature. At 45 °C in water and 25 °C in the 20 mol% mixture the smallest values are found for  $R_g$ . Both,  $R_g$  and  $R_h$  at high temperatures in water are smaller than in the mixture at room temperature. An intermediate value for  $R_g$  and  $R_h$  is found in the partly swollen state at 10 °C in the mixture. With respect to the  $\rho$ -ratio, it is known that a homogeneous sphere exhibits a value of 0.78. Studies by Senff et al.<sup>4</sup> documented ratios between 0.55 – 0.6 for PNIPAM microgels in the swollen state in water. In comparison, higher ratios close to the one of hard spheres are found in case of the microgel-catalysts. The  $\rho$ -ratios lie between 0.66 and 0.81. The smallest ratios are determined for the swollen microgel-catalysts in methanol and water, as well as for the partly swollen state at 10 °C in the 20 mol% methanol mixture. The  $\rho$ -ratios close to 0.78 indicate a less fuzzy, more homogeneous structure of the microgel-catalysts compared to pure PNIPAM microgels.

## Dissipative Particle Dynamics Simulations (DPD)

**Table S2.** DPD interaction parameters (in units of  $k_B T/r_c$ ) at  $T = 25$  °C used in the simulations. The numbers in brackets in the non-diagonal cells are the corresponding values of Flory-Huggins parameter.

| $a_{ij}(\chi_{ij})$ | P                         | L                         | N                          | C                         | W                          | M                         |
|---------------------|---------------------------|---------------------------|----------------------------|---------------------------|----------------------------|---------------------------|
| P                   | 25                        | 26.63 <sup>a</sup> (0.50) | 30.9 <sup>a</sup> (1.80)   | 27.16 <sup>a</sup> (0.66) | 25.6 <sup>b</sup> (0.18)   | 25 <sup>c</sup> (0.00)    |
| L                   | 26.63 <sup>a</sup> (0.50) | 25                        | 28.37 <sup>a</sup> (1.03)  | 26.7 <sup>a</sup> (0.52)  | 25 <sup>c</sup> (0.00)     | 28,52 <sup>a</sup> (1.07) |
| N                   | 30.9 <sup>a</sup> (1.80)  | 28.37 <sup>a</sup> (1.03) | 25                         | 29.72 <sup>a</sup> (1.44) | 57.73 <sup>a</sup> (10.01) | 37.95 <sup>a</sup> (3.96) |
| C                   | 27.16 <sup>a</sup> (0.66) | 26.7 <sup>a</sup> (0.52)  | 29.72 <sup>a</sup> (1.44)  | 25                        | 56.35 <sup>a</sup> (9.59)  | 32.49 <sup>a</sup> (2.29) |
| W                   | 25.6 <sup>b</sup> (0.18)  | 25 <sup>c</sup> (0.00)    | 57.73 <sup>a</sup> (10.01) | 56.35 <sup>a</sup> (9.59) | 25                         | <sup>d</sup> -            |
| M                   | 25 <sup>c</sup> (0.00)    | 28,52 <sup>a</sup> (1.07) | 37.95 <sup>a</sup> (3.96)  | 32.49 <sup>a</sup> (2.29) | <sup>d</sup> -             | 25                        |

<sup>a</sup> Calculated from Hansen solubility parameter<sup>5</sup> <sup>b</sup> Calculated using the approach of Yong *et al.*<sup>6</sup>

<sup>c</sup> Fixed values <sup>d</sup> The interactions that weren't considered both in experiments and simulations

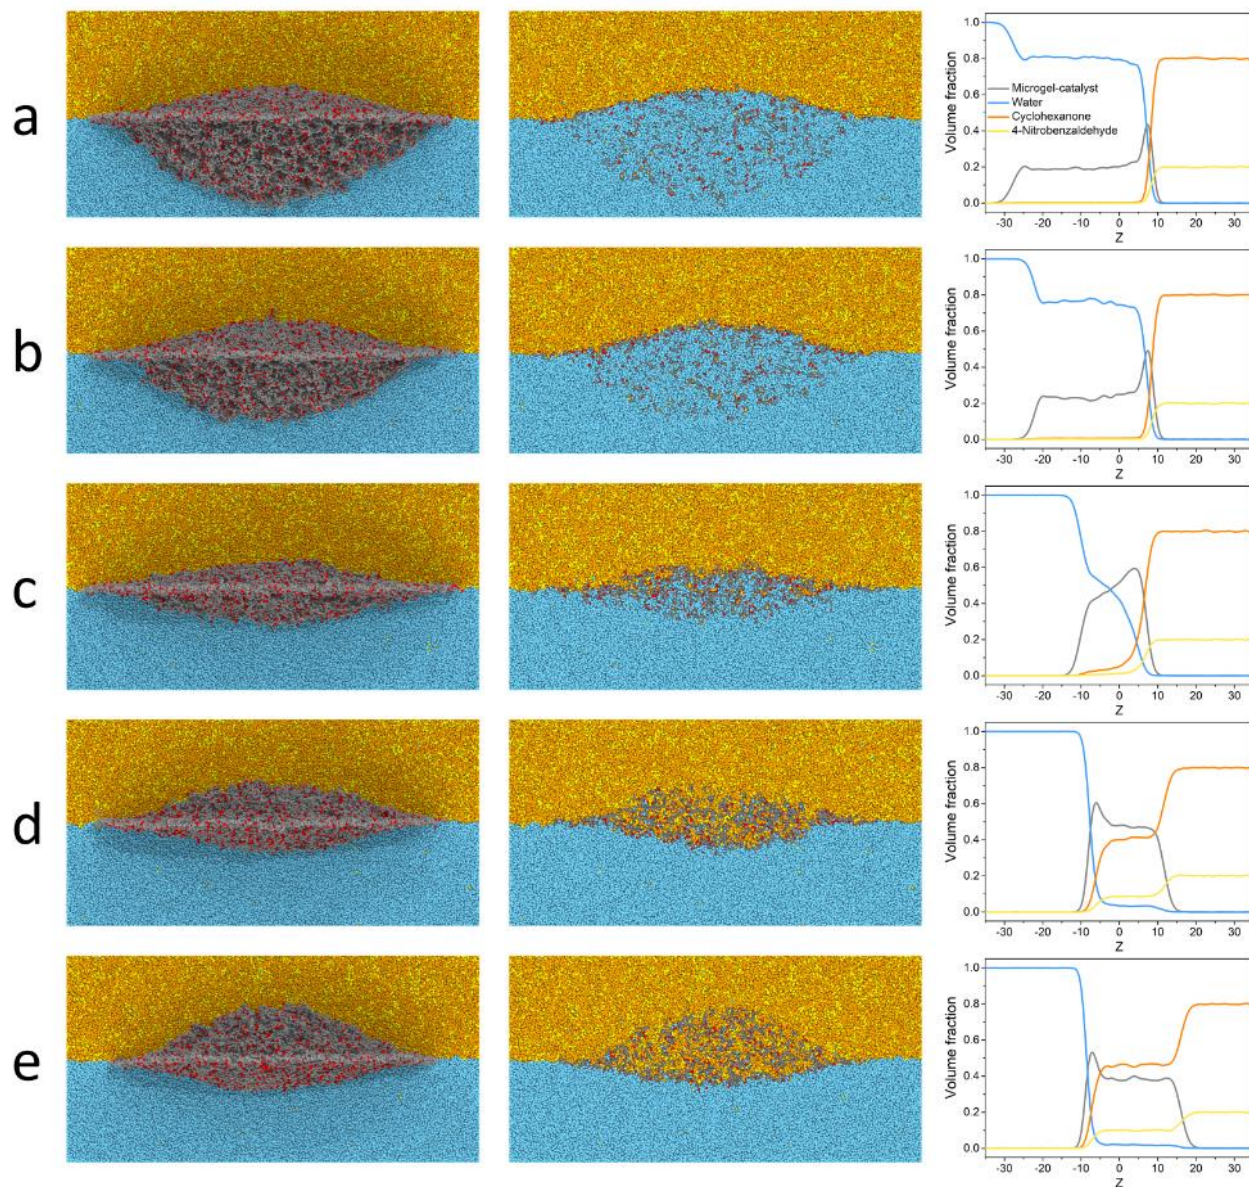

**Figure S6.** Side views of the adsorbed microgels (left column), cross-section of the microgels through the centre of mass and of PNIPAM (grey), L-proline (red), 4-nitrobenzaldehyde (yellow), cyclohexanone (orange) and water (blue) beads (middle column), concentration profiles along the normal to the interface, z-axis (right column). The lines of different colours correspond to the concentrations of respective types of beads. Different rows correspond to different temperatures:  $T = 25\text{ }^{\circ}\text{C}$  (a),  $T = 30\text{ }^{\circ}\text{C}$  (b),  $T = 35\text{ }^{\circ}\text{C}$  (c),  $T = 40\text{ }^{\circ}\text{C}$  (d) and  $T = 45\text{ }^{\circ}\text{C}$  (e).

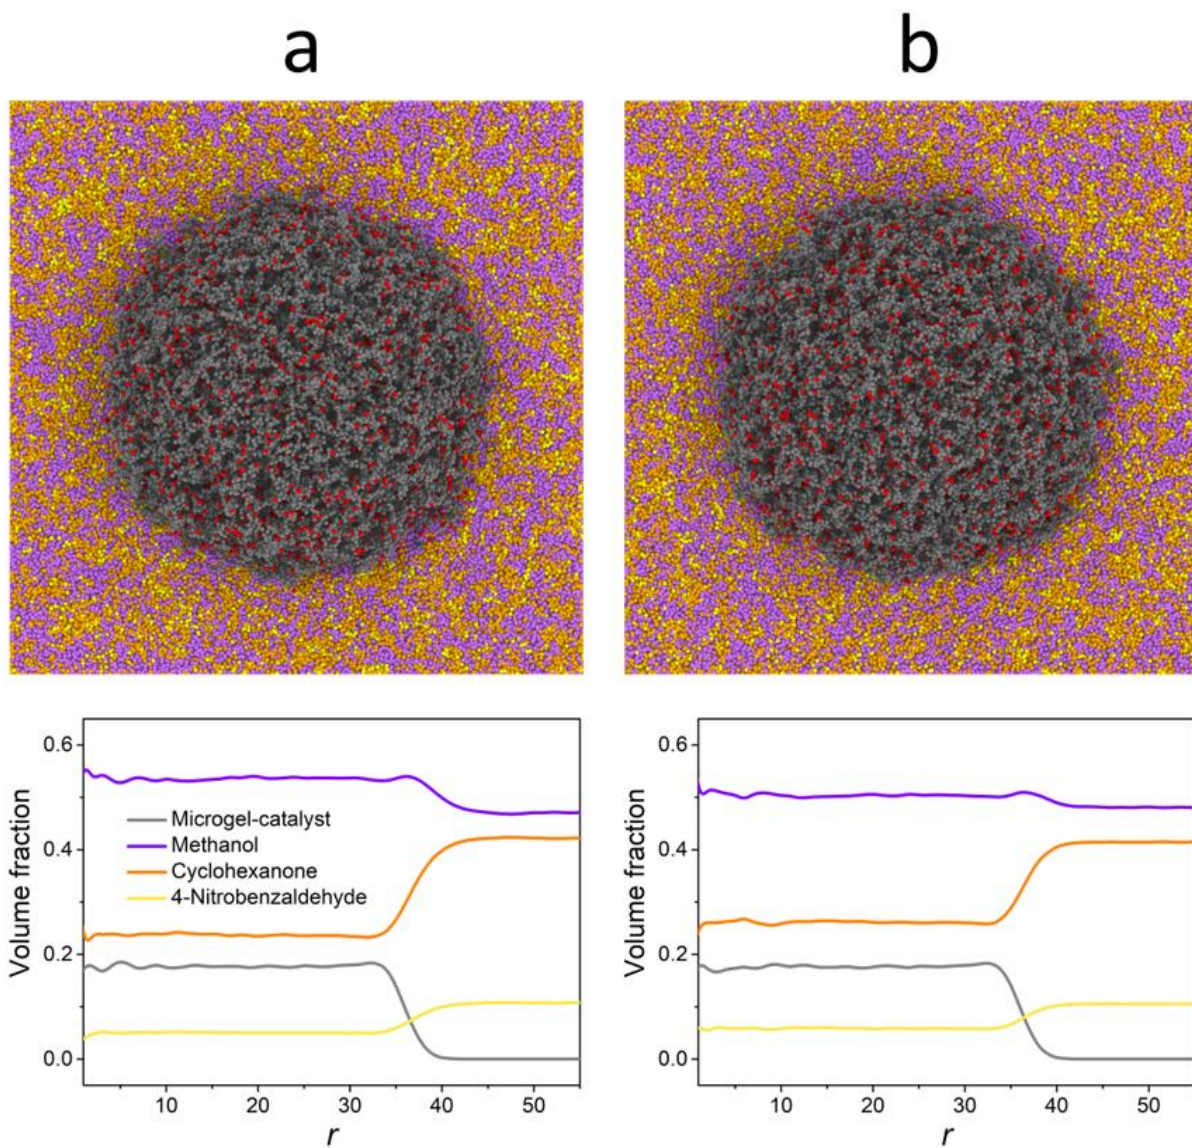

**Figure S7.** Snapshots of single microgels in methanol-reagents mixture (upper row) and corresponding radial concentration profiles from microgel's centre of mass (lower row) at  $T = 25\text{ °C}$  (a) and  $T = 45\text{ °C}$  (b). The lines of different colors correspond to the concentrations of respective types of beads: PNIPAM + L-proline (grey), 4-nitrobenzaldehyde (yellow), cyclohexanone (orange) and methanol (purple).

## References

- 1 T. E. Kristensen, K. Vestli, K. A. Fredriksen, F. K. Hansen and T. Hansen, *Org. Lett.*, 2009, **11**, 2968–2971.
- 2 D. Kleinschmidt, M. Sofia Fernandes, M. Mork, A. Astrid Meyer, J. Krischel, M. V. Anakhov, R. A. Gumerov, I. I. Potemkin, M. Rueping and A. Pich, *J. Colloid Interface Sci.*, 2019, **559**, 76–87.
- 3 M. E. Jacox, *J. Phys. Chem. Ref. Data*, , DOI:10.1063/1.1497629.
- 4 H. Senff and W. Richtering, *Colloid Polym. Sci.*, 2000, **278**, 830–840.
- 5 C. M. Hansen, *Hansen Solubility Parameters: A User's Handbook*, CRC Press, Boca Raton, 2nd edn., 2007.
- 6 X. Yong, O. Kuksenok, K. Matyjaszewski and A. C. Balazs, *Nano Lett.*, 2013, **13**, 6269–6274.
